# Supplementary material for: Electrocatalytic hydrogen production activity with a copper(ii)-dipyridylamine complex in acidic water
Source: Royal Society of Chemistry journal article supplement (doi:10.1039/d3ce00996c), 2023-01-01
Supplement: d3ce00996c1.pdf [file d3ce00996c1.pdf]

## Electronic Supplementary Information

# An electrocatalytic hydrogen production activity with a copper(II) complex supported by dipyridylamine ligand in acidic water

*Nilankar Diyali<sup>†</sup>, Meena Chettri<sup>†</sup>, Subhajit Saha<sup>†</sup>, Ankita Saha<sup>†</sup>, Subhankar Kundu<sup>†</sup> Debasis  
Mondal<sup>‡</sup>, Debasish Dhak<sup>‡</sup> and Bhaskar Biswas<sup>\*, †</sup>*

---

<sup>†</sup>*Department of Chemistry, University of North Bengal, Darjeeling-734013, India.*

<sup>‡</sup>*Department of Chemistry, Sidho-Kanho-Birsha University Purulia, 732104, India.*

## Table of Content

|           |                                                                                                                                                                                                                                                                                                                                                                  | Page No. |
|-----------|------------------------------------------------------------------------------------------------------------------------------------------------------------------------------------------------------------------------------------------------------------------------------------------------------------------------------------------------------------------|----------|
| <b>A.</b> | <b>Experimental</b>                                                                                                                                                                                                                                                                                                                                              | S1- S2   |
|           | 1. Physical measurements                                                                                                                                                                                                                                                                                                                                         | S1       |
|           | 2. HER by $[\text{Cu}(\text{dpa})_2(\text{N}_3)]^+$                                                                                                                                                                                                                                                                                                              | S1       |
|           | 3. Catalyst concentration dependence study                                                                                                                                                                                                                                                                                                                       | S1- S2   |
|           | 4. DFT Study                                                                                                                                                                                                                                                                                                                                                     | S2       |
| <b>B.</b> | <b>Figures</b>                                                                                                                                                                                                                                                                                                                                                   | S3-S12   |
|           | 1. FT-IR spectra of $[\text{Cu}(\text{dpa})_2(\text{N}_3)]^+$                                                                                                                                                                                                                                                                                                    | S3       |
|           | 2. <b>(a)</b> UV-Vis spectra of $[\text{Cu}(\text{dpa})_2(\text{N}_3)]^+$ in water; <b>(b)</b> UV-Vis spectra of $[\text{Cu}(\text{dpa})_2(\text{N}_3)]^+$ in water for stability test over 3 days; <b>(c)</b> UV-Vis spectra of $[\text{Cu}(\text{dpa})_2(\text{N}_3)]^+$ and in presence of 0.1 M KCl in water media.                                          | S3       |
|           | 3. ESI-MS of $[\text{Cu}(\text{dpa})_2(\text{N}_3)]^+$ in water                                                                                                                                                                                                                                                                                                  | S3       |
|           | 4. Structural validity of the $[\text{Cu}(\text{dpa})_2(\text{N}_3)]\text{Cl}\cdot 4\text{H}_2\text{O}$ with crystallographic bond distance and bond angle measurement.                                                                                                                                                                                          | S4       |
|           | 5. CVs of <b>GCE</b> , <b>dpa</b> and $[\text{Cu}(\text{dpa})_2(\text{N}_3)]^+$                                                                                                                                                                                                                                                                                  | S4       |
|           | 6. Plot of current vs. scan rate of $[\text{Cu}(\text{dpa})_2(\text{N}_3)]^+$ .                                                                                                                                                                                                                                                                                  | S5       |
|           | 7. Comparison of the CV of $\text{CuCl}_2\cdot 2\text{H}_2\text{O}$ salt and $[\text{Cu}(\text{dpa})_2(\text{N}_3)]^+$ with the addition of 14 mM AcOH.                                                                                                                                                                                                          | S5       |
|           | 8. <b>(a)</b> <b>dpa</b> titration with AcOH in 0.1 M KCl; <b>(b)</b> only 0.1 M KCl titration with AcOH                                                                                                                                                                                                                                                         | S6       |
|           | 9. <b>(a)</b> CVs in 0.1 M KCl solution in the presence of 14 mM AcOH (red) and with $[\text{Cu}(\text{dpa})_2(\text{N}_3)]^+$ in 14 mM AcOH. <b>(b)</b> CVs were recorded in an electrolyte-only solution using a freshly polished <b>GCE</b> and an electrode after CPE in a solution of 1mM $[\text{Cu}(\text{dpa})_2(\text{N}_3)]^+$ and 14 mM AcOH for 3 h. | S6       |
|           | 10. Plot of catalytic current ( $i_c$ ) vs. concentration of AcOH.                                                                                                                                                                                                                                                                                               | S7       |
|           | 11. CVs in 0.1 M KCl aqueous solution containing 14 mM AcOH with different concentrations of $[\text{Cu}(\text{dpa})_2(\text{N}_3)]^+$ at a scan rate of 100 mV/s.                                                                                                                                                                                               | S7       |
|           | 12. Hydrogen gas detection by gas chromatography (GC).                                                                                                                                                                                                                                                                                                           | S8       |
|           | 13. CV of complex and recovered complex.                                                                                                                                                                                                                                                                                                                         | S8       |
|           | 14. UV-Vis titration of $[\text{Cu}(\text{dpa})_2(\text{N}_3)]^+$ using 0.5 to 11 mM of AcOH.                                                                                                                                                                                                                                                                    | S9       |
|           | 15. <b>(a)</b> UV-Vis plot of $[\text{Cu}(\text{dpa})_2(\text{N}_3)]^+$ in a citrate-phosphate buffer in the pH range of 3-7. <b>(b)</b> Plot of absorbance vs. pH at 345 nm.                                                                                                                                                                                    | S9       |

|           |                                                                                                                                             |          |
|-----------|---------------------------------------------------------------------------------------------------------------------------------------------|----------|
| 16.       | UV-Vis titration of <b>dpa</b> using 0.5 to 11 mM of AcOH.                                                                                  | S10      |
| 17.       | Decrement of the d-d band of the $[\text{Cu}(\text{dpa})_2(\text{N}_3)]^+$ .                                                                | S10      |
| 18.       | Energy profile of different N-protonated species using DFT calculation.                                                                     | S11      |
| 19.       | UV-Vis spectra of $[\text{Cu}(\text{dpa})_2(\text{N}_3)]^+$ in water and after one equivalent sodium naphthalene as one electron reductant. | S11      |
| 20.       | The spin density plot of N-site protonated.                                                                                                 | S12      |
| 21.       | Optimized structure of intermediates.                                                                                                       | S12      |
| <b>C.</b> | <b>Calculation</b>                                                                                                                          | S13- S14 |
| 1.        | Determination of diffusion coefficient (D) of $[\text{Cu}(\text{dpa})_2(\text{N}_3)]^+$ in 0.1 M KCl aqueous solution                       | S13      |
| 2.        | Calculation of net charge based on Control potential Electrolysis (CPE) in aqueous                                                          | S13      |
| 3.        | Calculation of theoretical Moles of Hydrogen Made via Total Charge                                                                          | S13      |
| 4.        | Calculation of Turnover number (TON)                                                                                                        | S14      |
| <b>D.</b> | <b>Tables</b>                                                                                                                               | S15-S31  |
| 1.        | Crystallographic structural parameters of $[\text{Cu}(\text{dpa})_2(\text{N}_3)]\text{Cl}\cdot 4\text{H}_2\text{O}$                         | S15      |
| 2.        | Selected bond distances (Å) and angles (°) of $[\text{Cu}(\text{dpa})_2(\text{N}_3)]\text{Cl}\cdot 4\text{H}_2\text{O}$                     | S16      |
| 3.        | Hydrogen bond lengths (Å) and angles (°) for $[\text{Cu}(\text{dpa})_2(\text{N}_3)]\text{Cl}\cdot 4\text{H}_2\text{O}$                      | S16      |
| 4.        | X $\cdots\pi$ bond lengths (Å) and angles (°) for $[\text{Cu}(\text{dpa})_2(\text{N}_3)]\text{Cl}\cdot 4\text{H}_2\text{O}$                 | S17      |
| 5.        | Electrochemical experimental results from a typical AcOH titration of $[\text{Cu}(\text{dpa})_2(\text{N}_3)]^+$                             | S17      |
| 6.        | Approximate catalytic rate constants, $k_{\text{app}}$ , with AcOH.                                                                         | S17      |
| 7.        | Comparison of homogeneous HER activity with reported Copper complexes.                                                                      | S18      |
| 8.        | Computational coordinates using B3LYP/6-311g(d,p) in water.                                                                                 | S18-S31  |
| <b>F.</b> | <b>References</b>                                                                                                                           | S32      |

## A. Experimental

### Physical measurements

FT-IR spectra of  $[\text{Cu}(\text{dpa})_2(\text{N}_3)]\text{Cl}\cdot 4\text{H}_2\text{O}$  were recorded using an FTIR-8400S SHIMADZU spectrometer in the  $400\text{-}3600\text{ cm}^{-1}$  range. Steady-state absorption spectral data of  $[\text{Cu}(\text{dpa})_2(\text{N}_3)]\text{Cl}\cdot 4\text{H}_2\text{O}$  was measured with a HITACHI U-2910 spectrophotometer. A Perkin Elmer 2400 CHN microanalyzer was employed to carry out the elemental analyses of the compounds. The structural characteristics of  $[\text{Cu}(\text{dpa})_2(\text{N}_3)]\text{Cl}\cdot 4\text{H}_2\text{O}$  were determined by powder X-ray diffractometer (Rigaku SmartLab) using  $\text{Cu-K}_\alpha$  radiation ranging from  $10^\circ\text{-}80^\circ$ . An RVL PG-Lyte-1.0 potentiostat consisting of a glassy-carbon working electrode, Pt counter electrode, and Ag/AgCl reference was employed to study the electrochemical analysis of the compounds.

### HER by $[\text{Cu}(\text{dpa})_2(\text{N}_3)]^+$

To investigate the hydrogen evolution activity, CV was recorded by taking 11.1 mg (1 mM) of  $[\text{Cu}(\text{dpa})_2(\text{N}_3)]^+$  in 0.1 M KCl, a supporting electrolyte in 20 ml aqueous solution. The 1 M acetic acid (AcOH) in a 10 ml volumetric flask was prepared as a stock solution to monitor the acid titration. The subsequent CVs were recorded with the addition of AcOH from the 0.1 M stock solution in the following amounts of 100  $\mu\text{L}$ , 200  $\mu\text{L}$ , 300  $\mu\text{L}$ , 400  $\mu\text{L}$  and so on. The pH of the solution of 1 mM  $[\text{Cu}(\text{dpa})_2(\text{N}_3)]^+$  in 0.1 M KCl was 6.20, recorded using Eutech pH 700 meter. In the same solution, with the addition of 14 mM AcOH and 18 mM AcOH, the pH was 3.56 and 3.17, respectively.

### Catalyst concentration dependence study

A 0.1 M stock solution of  $[\text{Cu}(\text{dpa})_2(\text{N}_3)]^+$  was prepared by dissolving 0.555 g  $[\text{Cu}(\text{dpa})_2(\text{N}_3)]\text{Cl}\cdot 4\text{H}_2\text{O}$  crystals with  $\text{H}_2\text{O}$  in a 10 mL volumetric flask. A 20 mL solution of 0.1 M KCl in  $\text{H}_2\text{O}$  was prepared in an electrochemical cell. 14 mM AcOH was added to the cell and

purged with nitrogen. CVs were taken from 0.0 to -1.6 V at 100 mV/s with the addition of 50  $\mu\text{L}$ , 100  $\mu\text{L}$ , 150  $\mu\text{L}$ , 200  $\mu\text{L}$ , and 250  $\mu\text{L}$  of the  $[\text{Cu}(\text{dpa})_2(\text{N}_3)]^+$  stock solution.

### **DFT study**

All the structures were optimized by Density functional theory (DFT) by using the B3LYP functional<sup>1</sup> and 6-311g(d,p) basic set. The calculation in water ( $\epsilon = 78.3553$ ) medium using IEFPCM solvation methods. Gauss view was used as a visualization tool, and all the analysis was carried out by Gaussian 16.<sup>2</sup> After obtaining the converged geometry, the vibrational harmonic frequencies were calculated at the same theoretical level to ensure that the imaginary frequency number was zero for the stationary point.

## B. Figures

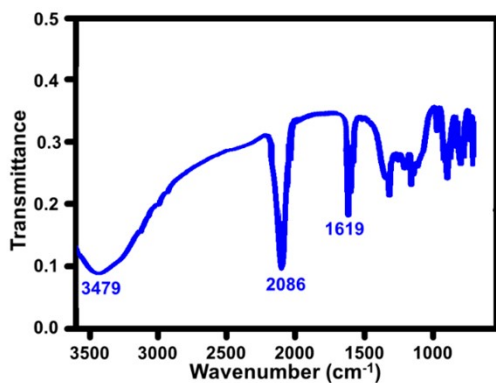

Figure S1. FT-IR spectra of [Cu(dpa)<sub>2</sub>(N<sub>3</sub>)]Cl·4H<sub>2</sub>O.

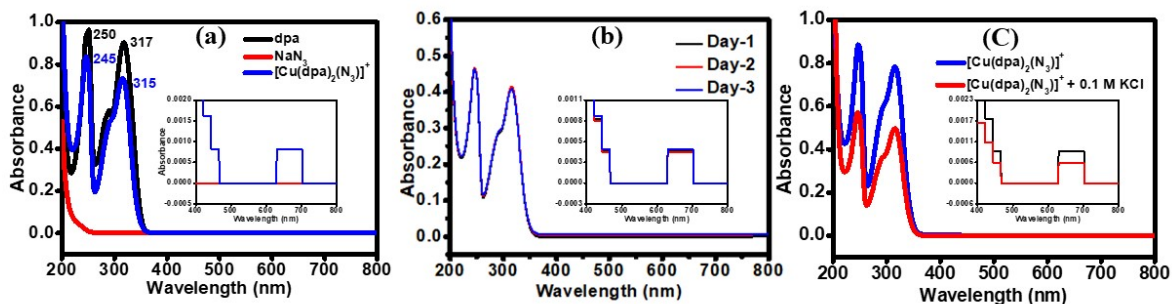

Figure S2. (a) UV-Vis spectra of [Cu(dpa)<sub>2</sub>(N<sub>3</sub>)]<sup>+</sup> in water; (b) UV-Vis spectra of [Cu(dpa)<sub>2</sub>(N<sub>3</sub>)]<sup>+</sup> in water for stability test over 3 days; (c) UV-Vis spectra of [Cu(dpa)<sub>2</sub>(N<sub>3</sub>)]<sup>+</sup> in water and the presence of 0.1 M KCl in water media.

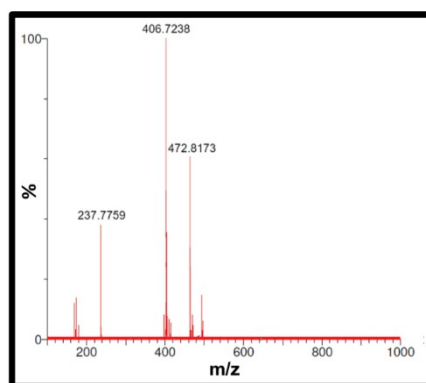

Figure S3. ESI-MS of [Cu(dpa)<sub>2</sub>(N<sub>3</sub>)]<sup>+</sup> in water.

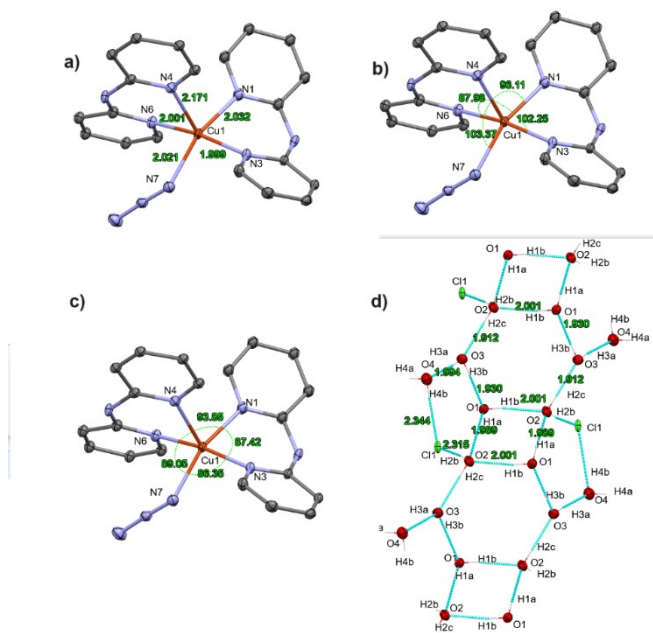

**Figure S4.** Structural validity of the copper complex with crystallographic bond distance and bond angle measurement.

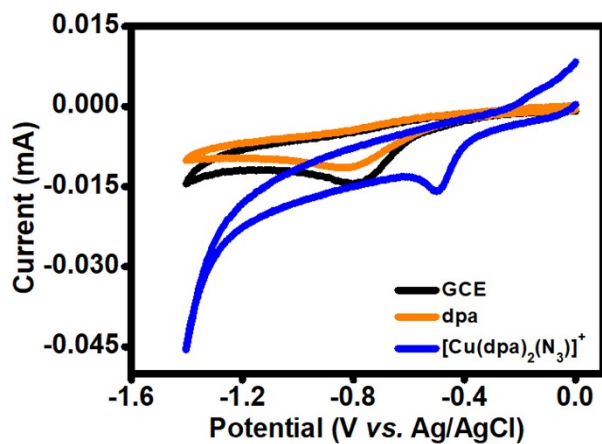

**Figure S5.** CVs of GCE (black), dpa (orange), and (blue)  $[\text{Cu}(\text{dpa})_2(\text{N}_3)]^+$ . Peak around -0.8 V vs. Ag/AgCl is due to dissolved  $\text{O}_2$ .

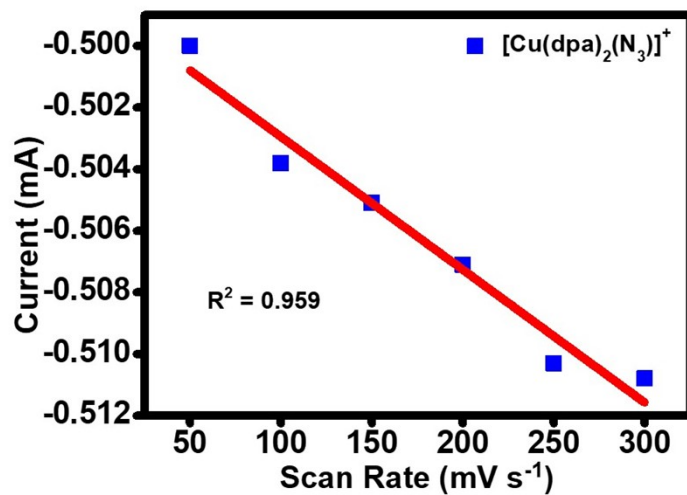

Figure S6. Plot of current vs. scan rate of  $[\text{Cu}(\text{dpa})_2(\text{N}_3)]^+$ .

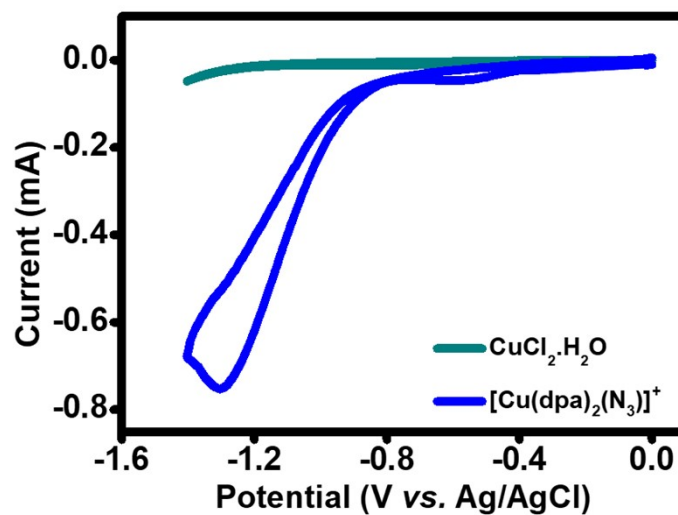

Figure S7. Comparison of CV of  $\text{CuCl}_2 \cdot 2\text{H}_2\text{O}$  salt and  $[\text{Cu}(\text{dpa})_2(\text{N}_3)]^+$  with addition of 14 mM AcOH.



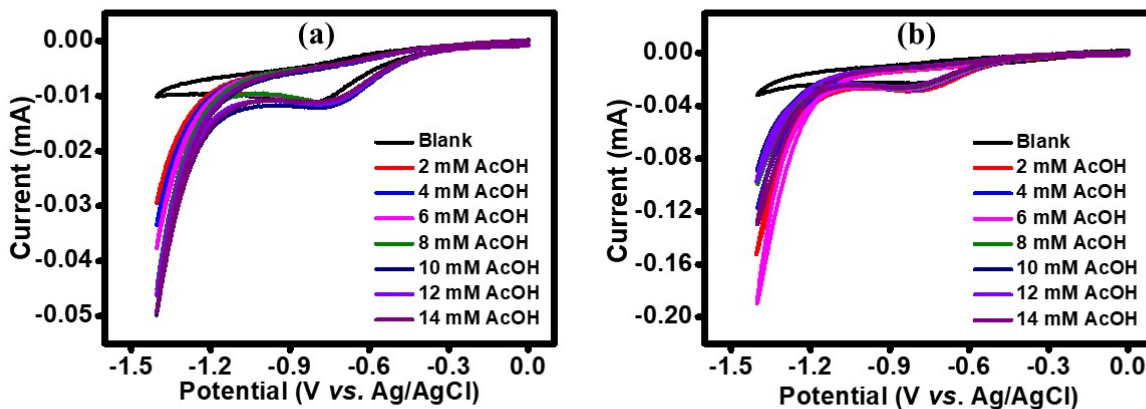

**Figure S8.** (a) dpa titration with AcOH in 0.1 M KCl; (b) only 0.1 M KCl titration with AcOH. (the appearance of a peak at around -0.8V (V vs. Ag/AgCl) is due to the presence of oxygen.)

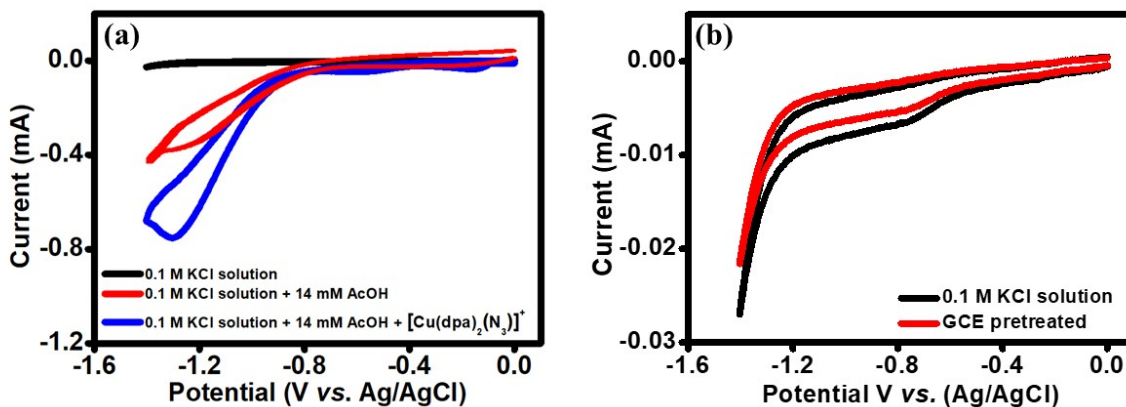

**Figure S9.** (a). CVs run in 0.1 M KCl as an electrolyte in aqueous solution (black), in the presence of 14 mM AcOH (red) and the presence of  $[\text{Cu}(\text{dpa})_2(\text{N}_3)]^+$  with 14 mM AcOH (blue). (b) CVs were recorded in an electrolyte-only solution using a freshly polished GCE (black trace) and an electrode after CPE in a solution of 1mM  $[\text{Cu}(\text{dpa})_2(\text{N}_3)]^+$  and 14 mM AcOH for 3 h (red trace).

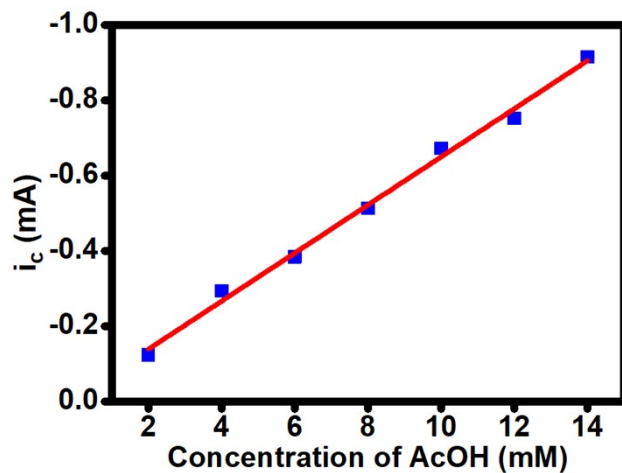

**Figure S10.** Plot of catalytic current ( $i_c$ ) vs. concentration of AcOH.

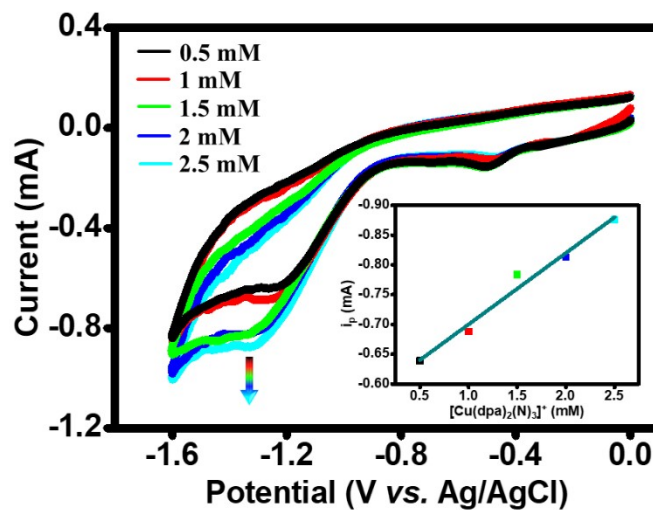

**Figure S11.** CVs in 0.1 M KCl aqueous solution containing 14 mM AcOH with different concentrations of  $[\text{Cu}(\text{dpa})_2(\text{N}_3)]^+$  at a scan rate of 100 mV/s. Inset  $i_p$  vs.  $[\text{Cu}(\text{dpa})_2(\text{N}_3)]^+$  fitted with a linear correlation exhibiting an  $R^2$  value of 0.99.

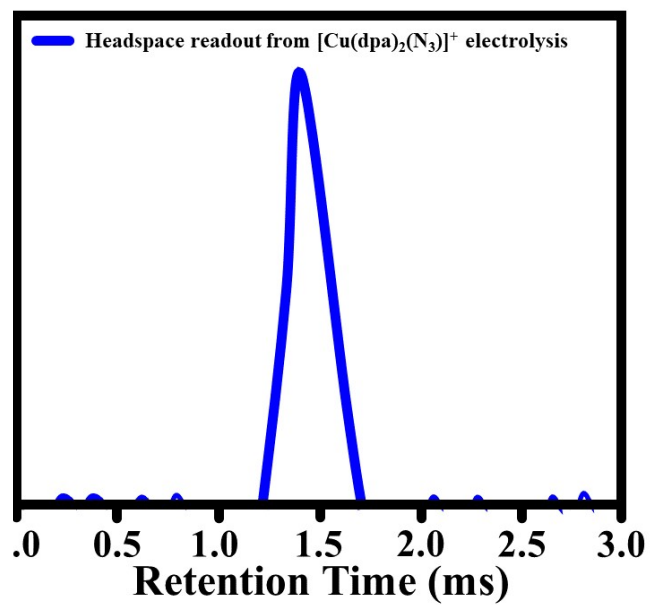

Figure S12. Hydrogen gas detection by gas chromatography (GC).

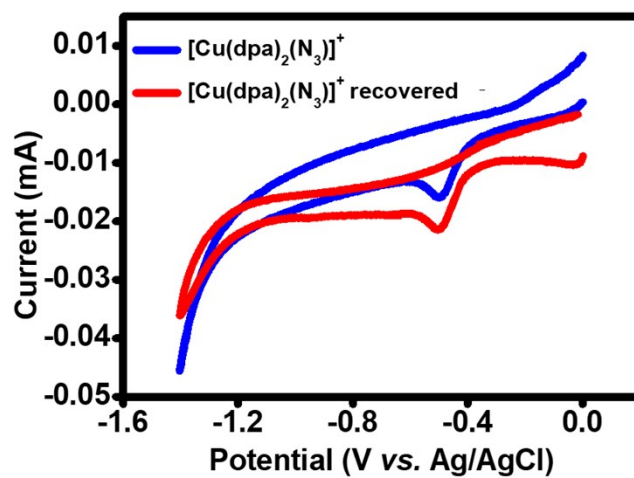

Figure S13. CV of complex and recovered complex.

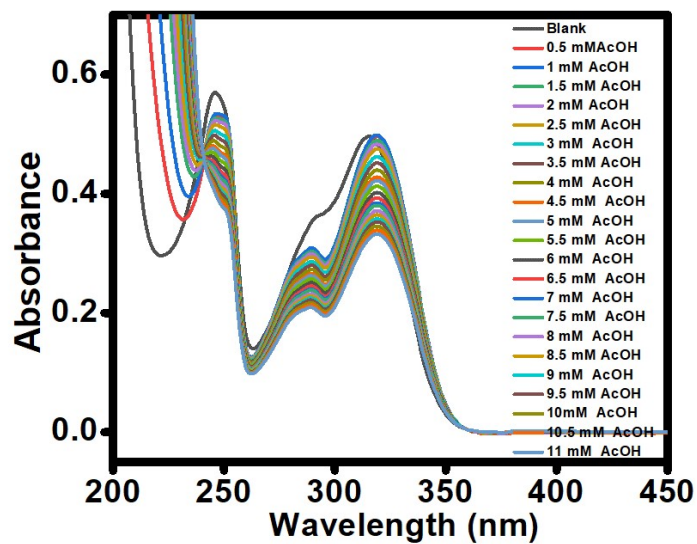

Figure S14. UV-Vis titration of  $[\text{Cu}(\text{dpa})_2(\text{N}_3)]^+$  using 0.5 to 11 mM of AcOH.

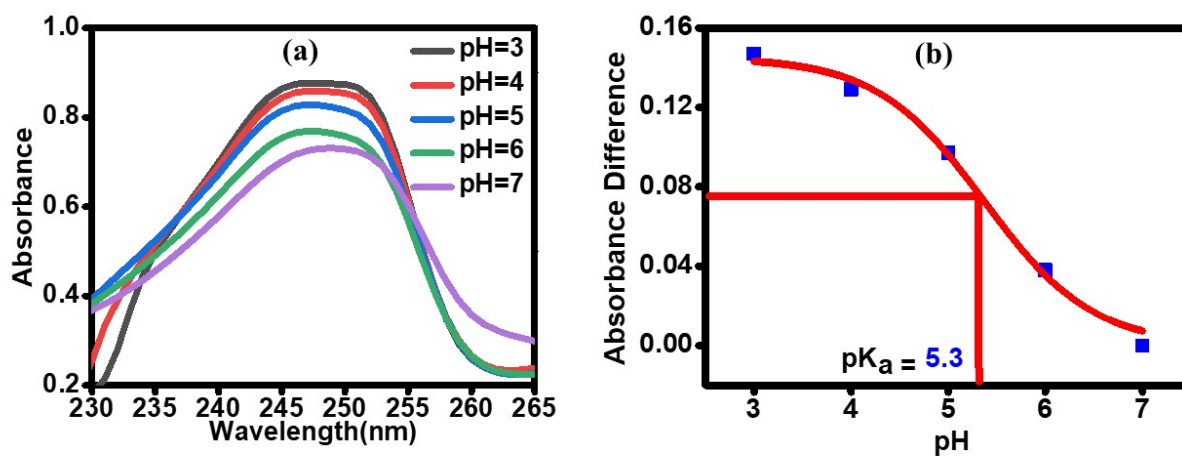

Figure S15. (a) UV-Vis plot of  $[\text{Cu}(\text{dpa})_2(\text{N}_3)]^+$  in a citrate-phosphate buffer in the pH range of 3-7. (b) Plot of absorbance vs. pH at 345 nm.

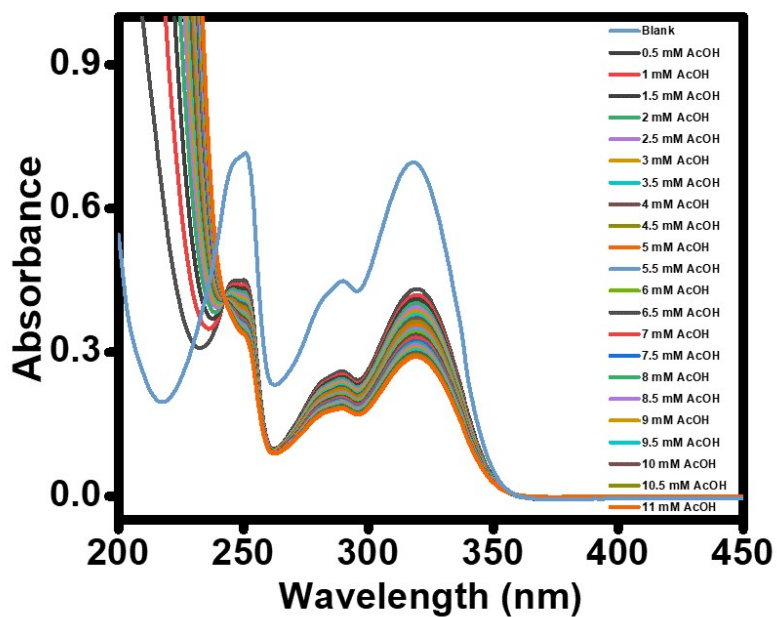

Figure S16. UV-Vis titration of dpa using 0.5 to 11 mM of AcOH.

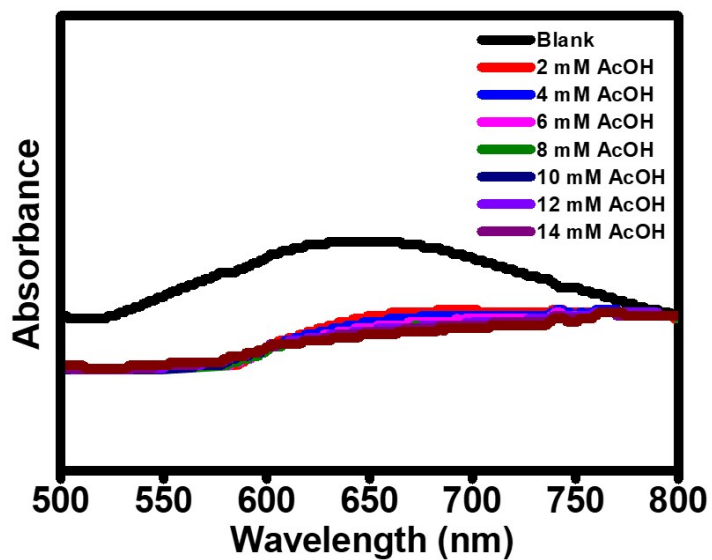

Figure S17. Decrement of the d-d band of the  $[\text{Cu}(\text{dpa})_2(\text{N}_3)]^+$ . A high concentration of complex was used to clarify the d-d band.

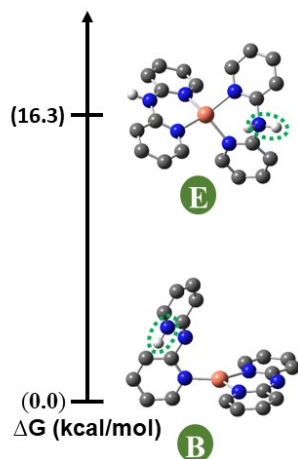

**Figure S18.** Energy profile of different N-protonated species using DFT calculation.

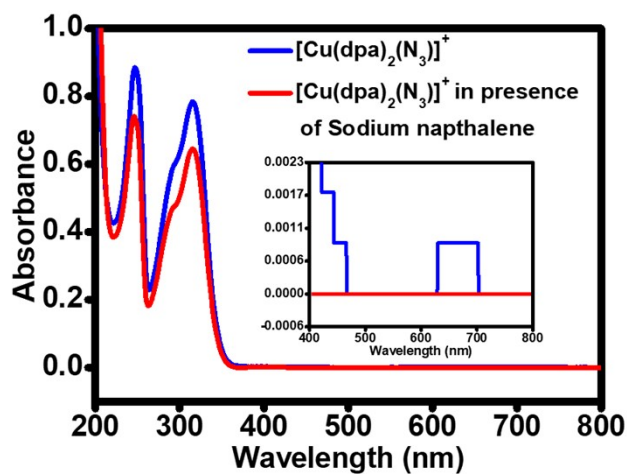

**Figure S19.** UV-Vis spectra of  $[\text{Cu}(\text{dpa})_2(\text{N}_3)]^+$  in water (blue) and after one equivalent sodium naphthalene as one electron reductant (red). Inset: Diminishing nature of d-d band.

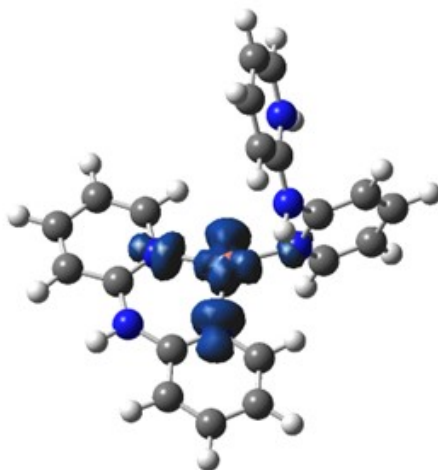

**Figure S20.** The spin density plot of N-site protonated intermediate (B) at an isovalue of 0.003.

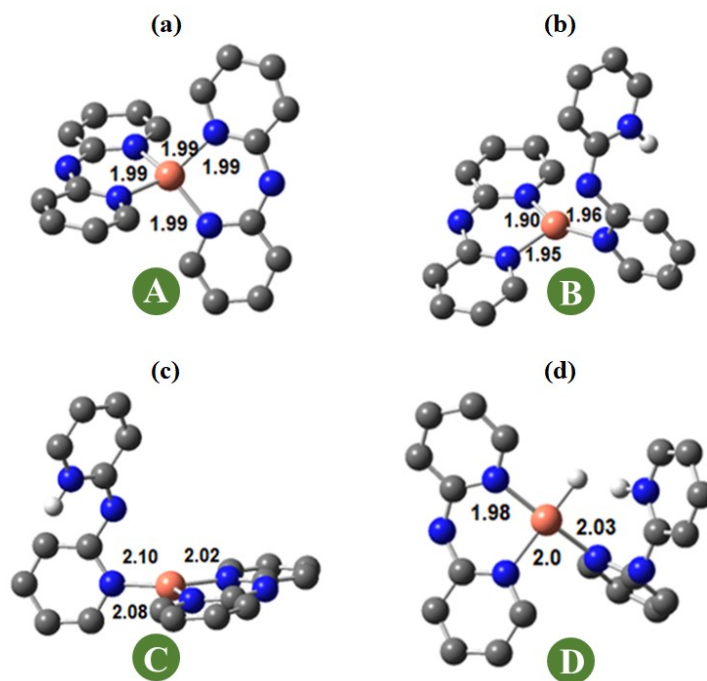

**Figure S21:** Optimized structure of intermediates a) N-site protonation of Cu(II) state, b) N-site protonation of Cu(I) state, c) doubly protonated Cu(II) intermediate state in Tafel step of  $[\text{Cu}(\text{dpa})_2(\text{N}_3)]^+$  electrocatalyst.

**C.CALCULATION**

**1. Determination of the diffusion coefficient (D) of [Cu(dpa)<sub>2</sub>(N<sub>3</sub>)]<sup>+</sup> in 0.1 M KCl aqueous solution**

The Diffusion Coefficient (D) was extracted from the theoretical slope using the equation below-

$$Slope = [0.4463nFAC^0 \left(\frac{nFD}{RT}\right)^{\frac{1}{2}}] \dots\dots\dots(S1)$$

$$D = \left(\frac{slope}{0.4463 n F A C^0}\right)^2 \frac{RT}{nF} \dots\dots\dots(S2)$$

Slope ≡ 3.65 × 10<sup>-3</sup>

Area of the glassy carbon electrode (A) = 0.071 cm<sup>2</sup>

Concentration of the analyte (C) = 1 × 10<sup>-3</sup> moles/cm

Faraday constant (F) = 96485 C/mole e<sup>-</sup>

R = ideal gas constant, and T = 298 K

$$D_0 = 4.432 \times 10^{-3} \text{ cm}^2 / \text{s}$$

**2. Calculations of net charge based on Control potential Electrolysis (CPE) in aqueous 0.1 M KCl:**

Total charge = Q<sub>with cat</sub> - Q<sub>blank</sub> = Q<sub>net</sub>

= 8.143 C - 0.04568 C = 8.09732 C

**3. Calculation of theoretical Moles of Hydrogen Made via Total Charge**

Moles H<sub>2</sub> theoretical = 8.143 x (1 mol e<sup>-</sup> / 96485 C) x (1 mol H<sub>2</sub> / 2 mol e<sup>-</sup>)

= 4.196 × 10<sup>-5</sup> moles H<sub>2</sub> based on the charge from electrolysis

**4. Calculation of turnover number (TON)**

$$TON = \frac{\text{Moles of } H_2 \text{ produced}}{\text{Moles of } [Cu(dpa)_2(N_3)]^+ \text{ used}}$$



$$\text{TON} = \frac{4.196 \times 10^{-5} \text{ moles } H_2 \text{ produced}}{0.000001 \text{ moles } [Cu(dpa)_2(N_3)]^+ \text{ used}}$$

$$\text{TON} = 41.96$$

Assuming two electrons are passed for each H<sub>2</sub> molecule produced (n=2), and the acid concentration does not change significantly during the measurement, the catalytic turnover frequency (k<sub>obs</sub> = k[H<sup>+</sup>]) can be calculated using equation

$$\frac{i_{cat}}{i_p} = \frac{n}{0.4463} \sqrt{\frac{RT(K [H^+])}{Fv}} \dots\dots\dots(S3)$$

The apparent rate constant (k<sub>app</sub>) associated with acid and catalyst is calculated using the **equation S4**.

$$i_c = nFAC_{cat}(Dk_{app}C_{acid})^{1/2} \dots\dots\dots(S4)$$

## D. Tables

| <b>Table S1. Crystallographic structural parameters of [Cu(dpa)<sub>2</sub>(N<sub>3</sub>)]Cl·4H<sub>2</sub>O</b> |                                                                   |
|-------------------------------------------------------------------------------------------------------------------|-------------------------------------------------------------------|
| <b>Parameters</b>                                                                                                 | <b>[Cu(dpa)<sub>2</sub>(N<sub>3</sub>)]Cl·4H<sub>2</sub>O</b>     |
| <b>CCDC</b>                                                                                                       | <b>2299272</b>                                                    |
| Empirical formula                                                                                                 | C <sub>20</sub> H <sub>26</sub> ClCuN <sub>9</sub> O <sub>4</sub> |
| Formula weight                                                                                                    | 555.49                                                            |
| T (K)                                                                                                             | 250K                                                              |
| Wavelength (Å)                                                                                                    | 1.54184                                                           |
| Crystal system                                                                                                    | Monoclinic                                                        |
| Space group                                                                                                       | <i>P21/c</i>                                                      |
| Unit Cell Dimensions                                                                                              |                                                                   |
| a (Å)                                                                                                             | 7.0295(4)                                                         |
| b (Å)                                                                                                             | 27.8164(16)                                                       |
| c (Å)                                                                                                             | 12.8722(7)                                                        |
| α (°)                                                                                                             | 90.00                                                             |
| β (°)                                                                                                             | 99.071(5)                                                         |
| γ (°)                                                                                                             | 90                                                                |
| V (Å <sup>3</sup> )                                                                                               | 2485.5(2)                                                         |
| Z                                                                                                                 | 4                                                                 |
| ρ (g cm <sup>-3</sup> )                                                                                           | 1.485                                                             |
| Absorption coefficient (mm <sup>-1</sup> )                                                                        | 1.032                                                             |
| F(000)                                                                                                            | 1148                                                              |
| Theta range for data collection                                                                                   | 2.7 to 32.8                                                       |
| Index ranges (h, k, l)                                                                                            | -8 ≤ h ≤ 8, -29 ≤ k ≤ 30, -14 ≤ l ≤ 9                             |
| Reflections collected                                                                                             | 16212                                                             |
| Independent reflections                                                                                           | 4195                                                              |

|                               |                                                   |
|-------------------------------|---------------------------------------------------|
| R(int)                        | 0.021                                             |
| Final R indices [I>2sigma(I)] | R <sub>1</sub> = 0.0605, wR <sub>2</sub> = 0.1593 |
| Largest diff. peak and hole   | 1.45/-1.13 e. Å <sup>-3</sup>                     |

| <b>Table S2. Selected bond distances (Å) and angles (°) of [Cu(dpa)<sub>2</sub>(N<sub>3</sub>)]Cl·4H<sub>2</sub>O.</b> |             |            |            |             |            |
|------------------------------------------------------------------------------------------------------------------------|-------------|------------|------------|-------------|------------|
|                                                                                                                        | <b>Exp.</b> | <b>DFT</b> |            | <b>Exp.</b> | <b>DFT</b> |
| Cu1-N3                                                                                                                 | 1.999(3)    | 2.0692     | Cu1-N8     | 2.033(3)    | 2.0783     |
| Cu1-N4                                                                                                                 | 2.170(3)    | 2.2837     | Cu1-NC     | 2.021(3)    | 1.9547     |
| Cu1-N5                                                                                                                 | 2.001(3)    | 2.0624     |            |             |            |
| ∠N3-Cu1-N4                                                                                                             | 102.27(10)  | 107.02     | ∠N3-Cu1-NC | 86.33(11)   | 87.38      |
| ∠N3-Cu1-N5                                                                                                             | 169.51(11)  | 167.73     | ∠N4-Cu1-N5 | 87.97(10)   | 85.23      |
| ∠N3-Cu1-N8                                                                                                             | 87.40(11)   | 86.52      | ∠N4-Cu1-N8 | 96.15(11)   | 94.29      |
| ∠N4-Cu1-NC                                                                                                             | 103.38(11)  | 97.29      | ∠N5-Cu1-NC | 89.09(11)   | 90.82      |
| ∠N5-Cu1-N8                                                                                                             | 93.84(11)   | 92.95      | ∠N8-Cu1-NC | 160.34(11)  | 168.06     |

| D–H···A      | <i>d</i> (D–H) | <i>d</i> (H···A) | <i>d</i> (D···A) | ∠(DHA) | Symmetry      |
|--------------|----------------|------------------|------------------|--------|---------------|
| O1--H1B..Cl5 | 0.85           | 2.31             | 3.156(3)         | 171    | x,y,1+z       |
| NA--HA..Cl5  | 0.86           | 2.55             | 3.251(2)         | 139    | x,y,1+z       |
| O2--H2B..Cl5 | 0.85           | 2.34             | 3.193(4)         | 177    | -1+x,y,z      |
| O3--H3A..O4  | 0.85           | 1.93             | 2.781(4)         | 175    | -x,1-y,2-z    |
| O3--H3B..O2  | 0.85           | 1.99             | 2.842(4)         | 177    | x,y,1+z       |
| O4--H4A..O1  | 0.85           | 1.99             | 2.842(4)         | 177    | 1-x,1-y,2-z   |
| CN--HN..NC   | 0.93           | 2.59             | 3.464(4)         | 156    | x,3/2-y,1/2+z |

| X···Cg( <i>I</i> ) | <i>d</i> [X···Cg( <i>I</i> )] | ∠[CHCg( <i>I</i> )] |
|--------------------|-------------------------------|---------------------|
| N9-NL[ 1] -> Cg5   | 3.357(4)                      | 8.76                |

| [[Cu(dpa) <sub>2</sub> (N <sub>3</sub> )] <sup>+</sup><br>(mM) | AcOH<br>(mM) | <i>i</i> <sub>c</sub> (mA) | <i>i</i> <sub>p</sub> (mA) | <i>i</i> <sub>cat</sub> / <i>i</i> <sub>p</sub> | Scan rate<br>(ϑ, V/s) | <i>k</i> <sub>obs</sub> (s <sup>-1</sup> ) |
|----------------------------------------------------------------|--------------|----------------------------|----------------------------|-------------------------------------------------|-----------------------|--------------------------------------------|
| 1                                                              | 2            | -0.124                     | -0.0569                    | 2.17                                            | 0.1                   | 0.90                                       |
| 1                                                              | 4            | -0.2944                    | -0.0569                    | 5.166                                           | 0.1                   | 5.15                                       |
| 1                                                              | 6            | -0.3847                    | -0.0569                    | 6.75                                            | 0.1                   | 8.79                                       |
| 1                                                              | 8            | -0.5132                    | -0.0569                    | 9.006                                           | 0.1                   | 15.65                                      |

**Table S7. Comparison of homogeneous HER activity with reported Copper complexes.**

| S. No | Electrocatalyst                                                                         | TON                                                  | Electrochemical media/proton source                                                                                                  | Stability/Durability                                                                                                                                                                       |       |       |                                   |
|-------|-----------------------------------------------------------------------------------------|------------------------------------------------------|--------------------------------------------------------------------------------------------------------------------------------------|--------------------------------------------------------------------------------------------------------------------------------------------------------------------------------------------|-------|-------|-----------------------------------|
| 1     | 1                                                                                       | 10                                                   | -0.6727                                                                                                                              | 11.89                                                                                                                                                                                      | 0.1   | 23.68 |                                   |
| 1     | 12                                                                                      | -0.7517                                              | -0.0569                                                                                                                              | 13.19                                                                                                                                                                                      | 0.1   | 33.56 |                                   |
| 1     | <sup>1</sup> [(bztpen)Cu](BF <sub>4</sub> ) <sub>2</sub> <sup>3</sup>                   | 14                                                   | -0.9157<br>10000 s <sup>-1</sup>                                                                                                     | -0.0569<br>Acidic aqueous buffer.                                                                                                                                                          | 16.07 | 0.1   | 49.81<br>Not explicitly discussed |
| 2     | [Cu(TMPA)Cl]Cl (1) and [Cu(Cl-TMPA)Cl <sub>2</sub> ] (2) <sup>4</sup>                   | (1) 6108 TON and (2) 10014 TON in 6 h                | CH <sub>3</sub> CN/H <sub>2</sub> O solution (9:1, v/v) with Ir complex as PS and triethylamine (TEA) as sacrificial reductant (SR). | After electrolysis for 2 h, characteristic NIR absorption of Cu(II) species was diminished.                                                                                                |       |       |                                   |
| 3     | [Cu(QCl-tpy)(OAc)(Cl)] (1), and [Cu(4Ql-tpy)(OAc)(OH <sub>2</sub> )Cl] (2) <sup>5</sup> | (1) 1153 s <sup>-1</sup><br>(2) 1682 s <sup>-1</sup> | 95:5 DMF/H <sub>2</sub> O (v/v) in the presence of AcOH as a proton source.                                                          | Not explicitly discussed                                                                                                                                                                   |       |       |                                   |
| 4     | [Cu(tpen)](PF <sub>6</sub> ) <sup>6</sup>                                               | 3415 s <sup>-1</sup>                                 | 95:5 DMF/H <sub>2</sub> O (v/v) in the presence of AcOH as a proton source.                                                          | 1)After electrolysis for 2 h, some minor spectral changes were observed in the UV–vis spectra.<br>2)FESEM and EDX analyses revealed a slight decomposition of copper on working electrode. |       |       |                                   |

**Table S6. Approximate catalytic rate constants, *k*<sub>app</sub>, with AcOH, were obtained using equation S4.**

| <i>k</i> <sub>app</sub> (2 mM)<br>M <sup>-1</sup> s <sup>-1</sup> | <i>k</i> <sub>app</sub> (4 mM)<br>M <sup>-1</sup> s <sup>-1</sup> | <i>k</i> <sub>app</sub> (6 mM)<br>M <sup>-1</sup> s <sup>-1</sup> | <i>k</i> <sub>app</sub> (8 mM)<br>M <sup>-1</sup> s <sup>-1</sup> | <i>k</i> <sub>app</sub> (10 mM)<br>M <sup>-1</sup> s <sup>-1</sup> | <i>k</i> <sub>app</sub> (12mM)<br>M <sup>-1</sup> s <sup>-1</sup> | <i>k</i> <sub>app</sub> (14mM)<br>M <sup>-1</sup> s <sup>-1</sup> |
|-------------------------------------------------------------------|-------------------------------------------------------------------|-------------------------------------------------------------------|-------------------------------------------------------------------|--------------------------------------------------------------------|-------------------------------------------------------------------|-------------------------------------------------------------------|
| 9.214                                                             | 26.04                                                             | 29.64                                                             | 39.56                                                             | 54.39                                                              | 56.59                                                             | 71.99                                                             |

|   |                                                                                                                                                                                                                                       |                                                                                    |                                                                             |                                                                                                                     |
|---|---------------------------------------------------------------------------------------------------------------------------------------------------------------------------------------------------------------------------------------|------------------------------------------------------------------------------------|-----------------------------------------------------------------------------|---------------------------------------------------------------------------------------------------------------------|
| 5 | $[\{(\text{OAc})_2\text{Cu}(\text{3py-tpy})\}_2\text{Cu}(\text{OAc})_2(\text{H}_2\text{O})_2]$ (1),<br>$\{[\text{Cu}(\text{4pytpy})(\text{OAc})]\text{Cl}\}_n$ (2)<br>and $[\text{Cu}(\text{Ph-tpy})(\text{OAc})_2]$ (3) <sup>7</sup> | (1) 1473 s <sup>-1</sup><br>(2) 700 s <sup>-1</sup><br>(3) 926 s <sup>-1</sup>     | 95:5 DMF/H <sub>2</sub> O (v/v) in the presence of AcOH as a proton source. | No substantial change in the CV and UV-vis spectrum recorded before and after the bulk electrolysis.                |
| 6 | <b>Cu(II)L</b> , <sup>8</sup>                                                                                                                                                                                                         | 10000 s <sup>-1</sup> and TON 52 in ACN and 5100 s <sup>-1</sup> and TON 73 in DMF | ACN and DMF with AcOH as a proton source.                                   | CPE reveals no sign of degradation over 23 h.                                                                       |
| 7 | <b>[Cu(dpa)<sub>2</sub>(N<sub>3</sub>)]<sup>+</sup></b><br>This work                                                                                                                                                                  | 241.75 s <sup>-1</sup> and TON 73.06                                               | AcOH in 0.1 M KCl water.                                                    | CPE reveals no sign of degradation over 1.6 h, PXRD, UV-vis spectrum displays negligible change after electrolysis. |

**Table S8. Computational coordinates using B3LYP/6-311g(d,p) in water.**

| <b>[Cu(dpa)<sub>2</sub>(N<sub>3</sub>)]<sup>+</sup></b> |          |          |          |
|---------------------------------------------------------|----------|----------|----------|
| Cu                                                      | 0.15354  | -0.04865 | -0.43176 |
| N                                                       | 2.04503  | -0.8642  | -0.62854 |
| N                                                       | 0.8458   | -1.09566 | 1.33476  |
| N                                                       | -1.61447 | 1.00169  | -0.58804 |
| N                                                       | -2.97803 | -0.69098 | 0.39302  |
| H                                                       | -3.92057 | -1.04878 | 0.36296  |
| N                                                       | 1.04564  | 1.41737  | 0.74062  |
| N                                                       | 3.11906  | 1.23032  | -0.37668 |
| H                                                       | 3.99588  | 1.70485  | -0.53196 |

|   |          |          |          |
|---|----------|----------|----------|
| C | 3.16034  | -0.12685 | -0.70001 |
| C | -2.1384  | -1.41543 | 1.23658  |
| C | -2.82717 | 0.48993  | -0.31667 |
| C | -2.70956 | -2.46581 | 1.97881  |
| H | -3.76068 | -2.7061  | 1.8699   |
| C | 2.281    | 1.88954  | 0.51131  |
| C | 4.38883  | -0.67407 | -1.10142 |
| H | 5.26937  | -0.04575 | -1.16212 |
| C | -0.08507 | -1.78824 | 2.2028   |
| H | 0.95486  | -1.48409 | 2.25464  |
| C | 4.45422  | -2.02167 | -1.39913 |
| H | 5.39435  | -2.46346 | -1.70688 |
| C | -1.5469  | 2.15954  | -1.28671 |
| H | -0.54808 | 2.53494  | -1.47407 |
| C | 0.28786  | 2.03921  | 1.67228  |
| H | -0.68297 | 1.59575  | 1.84264  |

|   |          |          |          |
|---|----------|----------|----------|
| C | -4.00322 | 1.1301   | -0.75693 |
| H | -4.96751 | 0.69424  | -0.52591 |
| C | 2.1245   | -2.18165 | -0.91836 |
| H | 1.18418  | -2.71402 | -0.88899 |
| C | -1.90783 | -3.17518 | 2.85137  |
| H | -2.32734 | -3.98734 | 3.4329   |
| C | 3.30037  | -2.80063 | -1.2911  |
| H | 3.30834  | -3.85879 | -1.51436 |
| C | -0.55957 | -2.82734 | 2.98033  |
| H | 0.09853  | -3.35285 | 3.65923  |
| C | -2.65041 | 2.83982  | -1.74836 |
| H | -2.53279 | 3.75643  | -2.31003 |
| C | 2.76243  | 3.04717  | 1.15017  |
| H | 3.75928  | 3.41042  | 0.93071  |
| C | -3.91306 | 2.29917  | -1.47872 |
| H | -4.81224 | 2.79225  | -1.82743 |
| C | 0.69701  | 3.16125  | 2.36039  |



|   |         |         |         |
|---|---------|---------|---------|
| H | 0.04643 | 3.6183  | 3.09352 |
| C | 1.96088 | 3.68738 | 2.0724  |
| H | 2.31955 | 4.57525 | 2.57911 |

|          |          |          |          |
|----------|----------|----------|----------|
| <b>E</b> |          |          |          |
| Cu       | -0.00001 | -0.00013 | 0.00004  |
| N        | 1.36091  | 1.27771  | 0.69414  |
| N        | -1.36029 | 1.27841  | -0.69394 |
| N        | -1.36113 | -1.27792 | 0.6938   |
| N        | -3.23793 | 0.00044  | -0.00082 |
| H        | -3.84142 | 0.43446  | 0.66808  |
| N        | -1.36055 | -1.27875 | -0.6934  |
| H        | 4.2481   | -0.0004  | -0.00054 |
| C        | 2.68775  | 1.06124  | 0.68852  |

|   |          |          |          |
|---|----------|----------|----------|
| C | 2.68719  | 1.06219  | -0.68901 |
| C | -2.68794 | -1.06122 | 0.6881   |
| C | -3.56984 | 1.92165  | -1.37146 |
| H | -4.63398 | 1.72683  | -1.34043 |
| C | 2.68737  | -1.06215 | -0.6886  |
| C | 3.57089  | 1.92035  | 1.37078  |
| H | 4.63499  | 1.72534  | 1.33917  |
| C | -0.87579 | 2.33051  | -1.40445 |
| H | 0.1989   | 2.44856  | -1.39645 |
| C | 3.06395  | 2.99009  | 2.0737   |
| H | 3.73463  | 3.65515  | 2.60316  |
| C | -0.87736 | -2.32983 | 1.40505  |
| H | 0.1973   | -2.44824 | 1.39769  |
| C | 0.87625  | -2.33085 | -1.40402 |
| H | -0.1984  | -2.44922 | -1.39584 |
| C | -3.57125 | -1.92008 | 1.37046  |

|   |          |          |          |
|---|----------|----------|----------|
| H | -4.6353  | -1.72485 | 1.33884  |
| C | 0.87693  | 2.32965  | 1.40524  |
| H | -0.19774 | 2.44791  | 1.39777  |
| C | -3.06237 | 2.99154  | -2.07378 |
| H | -3.73267 | 3.65687  | -2.60336 |
| C | 1.67987  | 3.20151  | 2.10069  |
| H | 1.23986  | 4.02188  | 2.64997  |
| C | -1.67824 | 3.20274  | -2.1     |
| H | -1.23781 | 4.02322  | -2.64878 |
| C | -1.68047 | -3.20149 | 2.10056  |
| H | -1.24061 | -4.02188 | 2.64995  |
| C | 3.57018  | -1.9212  | -1.37137 |
| H | 4.63427  | -1.72607 | -1.34047 |
| C | -3.06452 | -2.98983 | 2.07351  |
| H | -3.73532 | -3.6547  | 2.60304  |
| C | 1.67885  | -3.20272 | -2.09986 |

|          |          |          |          |
|----------|----------|----------|----------|
| H        | 1.2386   | -4.02323 | -2.64874 |
| C        | 3.06292  | -2.99108 | -2.07385 |
| H        | 3.73332  | -3.65609 | -2.6037  |
| H        | -3.84045 | -0.43368 | -0.67053 |
| <b>B</b> |          |          |          |
| Cu       | -0.00001 | -0.00013 | 0.00004  |
| N        | 1.36091  | 1.27771  | 0.69414  |
| N        | -1.36029 | 1.27841  | -0.69394 |
| N        | -1.36113 | -1.27792 | 0.6938   |
| N        | -3.23793 | 0.00044  | -0.00082 |
| H        | -4.2481  | 0.0006   | -0.0011  |
| N        | 1.36055  | -1.27875 | -0.6934  |
| N        | 3.23794  | -0.00047 | -0.00016 |
| H        | 4.2481   | -0.0004  | -0.00054 |
| C        | 2.68775  | 1.06124  | 0.68852  |
| C        | -2.68719 | 1.06219  | -0.68901 |
| C        | -2.68794 | -1.06122 | 0.6881   |

|   |          |          |          |
|---|----------|----------|----------|
| C | -3.56984 | 1.92165  | -1.37146 |
| H | -4.63398 | 1.72683  | -1.34043 |
| C | 2.68737  | -1.06215 | -0.6886  |
| C | 3.57089  | 1.92035  | 1.37078  |
| H | 4.63499  | 1.72534  | 1.33917  |
| C | -0.87579 | 2.33051  | -1.40445 |
| H | 0.1989   | 2.44856  | -1.39645 |
| C | 3.06395  | 2.99009  | 2.0737   |
| H | 3.73463  | 3.65515  | 2.60316  |
| C | -0.87736 | -2.32983 | 1.40505  |
| H | 0.1973   | -2.44824 | 1.39769  |
| C | 0.87625  | -2.33085 | -1.40402 |
| H | -0.1984  | -2.44922 | -1.39584 |
| C | -3.57125 | -1.92008 | 1.37046  |
| H | -4.6353  | -1.72485 | 1.33884  |
| C | 0.87693  | 2.32965  | 1.40524  |

|   |          |          |          |
|---|----------|----------|----------|
| H | -0.19774 | 2.44791  | 1.39777  |
| C | -3.06237 | 2.99154  | -2.07378 |
| H | -3.73267 | 3.65687  | -2.60336 |
| C | 1.67987  | 3.20151  | 2.10069  |
| H | 1.23986  | 4.02188  | 2.64997  |
| C | -1.67824 | 3.20274  | -2.1     |
| H | -1.23781 | 4.02322  | -2.64878 |
| C | -1.68047 | -3.20149 | 2.10056  |
| H | -1.24061 | -4.02188 | 2.64995  |
| C | 3.57018  | -1.9212  | -1.37137 |
| H | 4.63427  | -1.72607 | -1.34047 |
| C | -3.06452 | -2.98983 | 2.07351  |
| H | -3.73532 | -3.6547  | 2.60304  |
| C | 1.67885  | -3.20272 | -2.09986 |
| H | 1.2386   | -4.02323 | -2.64874 |
| C | 3.06292  | -2.99108 | -2.07385 |
| H | 3.73332  | -3.65609 | -2.6037  |
| H | -0.74308 | 0.67785  | -0.18563 |

| <b>C</b> |          |          |          |
|----------|----------|----------|----------|
| Cu       | -0.66152 | -0.27456 | -0.63694 |
| N        | -1.57501 | 1.37782  | -0.89961 |
| N        | 3.59672  | 0.94106  | 0.11706  |
| N        | 0.81386  | -1.52144 | -0.99209 |
| N        | 1.9313   | -0.56059 | 0.83156  |
| H        | 1.39113  | -0.8833  | 1.62547  |
| N        | -2.02467 | -1.08632 | 0.50166  |
| N        | -3.27777 | 0.92962  | 0.67801  |
| H        | -4.07585 | 1.33886  | 1.14356  |
| C        | -2.67493 | 1.76661  | -0.2337  |
| C        | 2.82968  | 0.43068  | 1.10839  |
| C        | 1.9681   | -1.42179 | -0.29455 |
| C        | 2.96096  | 0.97992  | 2.39268  |
| H        | 2.35847  | 0.58348  | 3.19826  |
| C        | -3.07276 | -0.39786 | 0.9917   |
| C        | -3.236   | 3.03714  | -0.45472 |
| H        | -4.12235 | 3.33006  | 0.09246  |
| C        | 4.49578  | 1.94549  | 0.3084   |
| H        | 5.04871  | 2.24964  | -0.56775 |
| C        | -2.65037 | 3.88074  | -1.37228 |
| H        | -3.07694 | 4.85956  | -1.55126 |
| C        | 0.75616  | -2.36649 | -2.04373 |

|    |          |          |          |
|----|----------|----------|----------|
| H  | -0.19044 | -2.43318 | -2.56357 |
| C  | -1.87792 | -2.39656 | 0.83017  |
| H  | -1.02105 | -2.90046 | 0.4073   |
| C  | 3.09817  | -2.1481  | -0.63752 |
| H  | 3.99493  | -2.06935 | -0.03814 |
| C  | -1.01    | 2.21259  | -1.81175 |
| H  | -0.13564 | 1.83762  | -2.32896 |
| C  | 3.85838  | 2.00479  | 2.60243  |
| H  | 3.96039  | 2.42436  | 3.59515  |
| C  | -1.51197 | 3.46321  | -2.07512 |
| H- | 1.03092  | 4.09535  | -2.80773 |
| C  | 4.64725  | 2.49963  | 1.54875  |
| H  | 5.3599   | 3.29668  | 1.70055  |
| C  | 1.85156  | -3.10961 | -2.45121 |
| H  | 1.76381  | -3.76614 | -3.30552 |
| C  | -4.0006  | -1.01696 | 1.84976  |
| H  | -4.83417 | -0.44192 | 2.23116  |
| C  | 3.04119  | -2.99471 | -1.74184 |
| H  | 3.91134  | -3.57343 | -2.02378 |
| C  | -2.75409 | -3.0574  | 1.65634  |
| H  | -2.59292 | -4.10094 | 1.88652  |
| C  | -3.839   | -2.34361 | 2.17952  |
| H  | -4.55206 | -2.82674 | 2.83539  |



|          |          |          |          |
|----------|----------|----------|----------|
| H        | 3.49922  | 0.57482  | -0.82437 |
| <b>D</b> |          |          |          |
| Cu       | -0.00001 | -0.00013 | 0.00004  |
| N        | 1.36091  | 1.27771  | 0.69414  |
| N        | -1.36029 | 1.27841  | -0.69394 |
| N        | -1.36113 | -1.27792 | 0.6938   |
| N        | -3.23793 | 0.00044  | -0.00082 |
| H        | -4.2481  | 0.0006   | -0.0011  |
| N        | 1.36055  | -1.27875 | -0.6934  |
| N        | 3.23794  | -0.00047 | -0.00016 |
| H        | 4.2481   | -0.0004  | -0.00054 |
| C        | 2.68775  | 1.06124  | 0.68852  |
| C        | -2.68719 | 1.06219  | -0.68901 |
| C        | -2.68794 | -1.06122 | 0.6881   |
| C        | -3.56984 | 1.92165  | -1.37146 |
| H        | -4.63398 | 1.72683  | -1.34043 |
| C        | 2.68737  | -1.06215 | -0.6886  |
| C        | 3.57089  | 1.92035  | 1.37078  |
| H        | 4.63499  | 1.72534  | 1.33917  |
| C        | -0.87579 | 2.33051  | -1.40445 |
| H        | 0.1989   | 2.44856  | -1.39645 |
| C        | 3.06395  | 2.99009  | 2.0737   |

|   |          |          |          |
|---|----------|----------|----------|
| H | 3.73463  | 3.65515  | 2.60316  |
| C | -0.87736 | -2.32983 | 1.40505  |
| H | 0.1973   | -2.44824 | 1.39769  |
| C | 0.87625  | -2.33085 | -1.40402 |
| H | -0.1984  | -2.44922 | -1.39584 |
| C | -3.57125 | -1.92008 | 1.37046  |
| H | -4.6353  | -1.72485 | 1.33884  |
| C | 0.87693  | 2.32965  | 1.40524  |
| H | -0.19774 | 2.44791  | 1.39777  |
| C | -3.06237 | 2.99154  | -2.07378 |
| H | -3.73267 | 3.65687  | -2.60336 |
| C | 1.67987  | 3.20151  | 2.10069  |
| H | 1.23986  | 4.02188  | 2.64997  |
| C | -1.67824 | 3.20274  | -2.1     |
| H | -1.23781 | 4.02322  | -2.64878 |
| C | -1.68047 | -3.20149 | 2.10056  |
| H | -1.24061 | -4.02188 | 2.64995  |
| C | 3.57018  | -1.9212  | -1.37137 |
| H | 4.63427  | -1.72607 | -1.34047 |
| C | -3.06452 | -2.98983 | 2.07351  |
| H | -3.73532 | -3.6547  | 2.60304  |
| C | 1.67885  | -3.20272 | -2.09986 |
| H | 1.2386   | -4.02323 | -2.64874 |

|   |          |          |          |
|---|----------|----------|----------|
| C | 3.06292  | -2.99108 | -2.07385 |
| H | 3.73332  | -3.65609 | -2.6037  |
| H | -0.74308 | 0.67785  | -0.18563 |

## E. References

- 1 S. Grimme, *J. Comput. Chem.*, 2006, **27**, 1787–1799.
- 2 2016.
- 3 P. Zhang, M. Wang, Y. Yang, T. Yao and L. Sun, *Angew. Chemie - Int. Ed.*, 2014, **53**, 13803–13807.
- 4 J. Wang, C. Li, Q. Zhou, W. Wang, Y. Hou, B. Zhang and X. Wang, *Dalt. Trans.*, 2016, **45**, 5439–5443.
- 5 S. Rai, S. S. Akhter and S. K. Padhi, *Polyhedron*, 2021, **208**, 115425.

- 6 K. Majee, S. Rai, B. Panda and S. K. Padhi, *Electrochim. Acta*, 2020, **354**, 136614.
- 7 S. Rai and S. K. Padhi, *Electrochim. Acta*, 2020, **364**, 137277.
- 8 A. Z. Haddad, S. P. Cronin, M. S. Mashuta, R. M. Buchanan and C. A. Grapperhaus, *Inorg. Chem.*, 2017, **56**, 11254–11265.
